# Supplementary material for: Tuning pore size and hydrophobicity of macroporous hybrid silica films with high optical transmittance by a non-template route
Source: Royal Society of Chemistry journal article supplement (doi:10.1039/b804967j), 2008-01-01
Supplement: b804967j.pdf [file b804967j.pdf]

## Supporting information

for

Tuning pore size and hydrophobicity of macroporous hybrid silica films  
with high optical transmittance by a Non-template route

Dongjiang Yang, Yao Xu, Wujun Xu, Dong Wu, Yuhan Sun, and Huaiyong Zhu

Figure S1:

The AFM 2D image and the arbitrary hole scanning plot of sample F3 are shown in Figure S1. Obviously, the hole is approx 220 nm deep, which is similar to the thickness of the film (224 nm), indicating that the holes on the films go through the film from top to bottom.

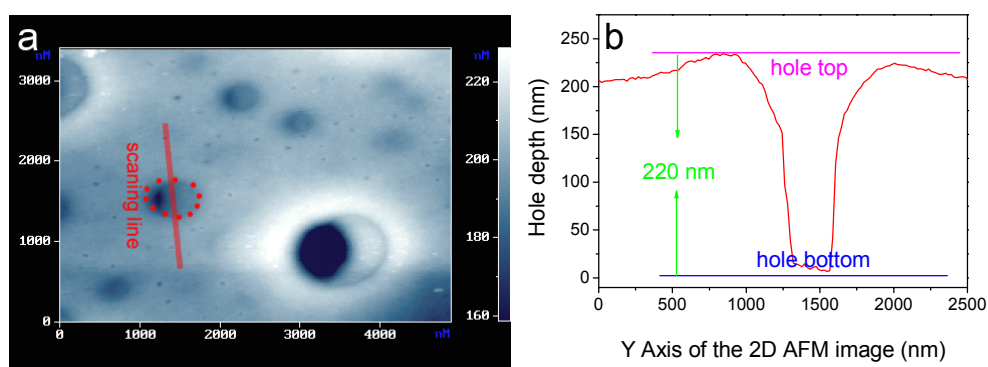

Figure S1. AFM 2D image (a) and the arbitrary hole scanning plot (b) of sample F3 a sharp tip

Figure S2

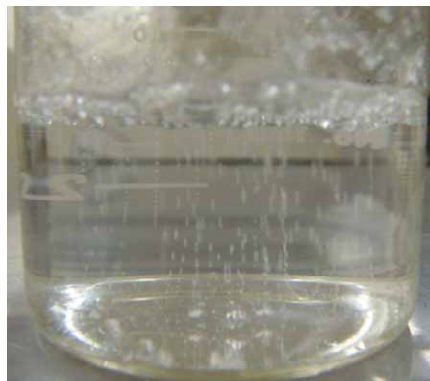

Figure S2. The H<sub>2</sub> bubbles generated from the hydrolysis process of PMHS
